# Supplementary material for: Mutant Lef1 controls Gata6 in sebaceous gland development and cancer
Source: PubMed Central journal article supplement (PMC6484415; doi:10.15252/embj.2018100526), 2019-03-18

## **Appendix Figures**

Appendix Figure S1: Reduction in Plet1 and Atp6v1c2 expression on loss of Gata6 in K14 $\Delta$ NLef1 tumors.

Appendix Figure S2: Reduction in Mlh1 and Msh2 expression on loss of Gata6 in K14 $\Delta$ NLef1 tumors.

Appendix Figure S3: Gata6 expression in a range of human skin tumors.

## **Appendix Figure legends**

### **Appendix Figure S1: Reduction in Plet1 and Atp6v1c2 expression on loss of Gata6 in K14 $\Delta$ NLef1 tumors.**

Digital tissue microarray of WT, K14 $\Delta$ NLef1 and K14 $\Delta$ NLef1:cKO mouse skin tumor sections labelled with antibodies to Plet1 and Atp6v1c2. Some of these images are also depicted in Fig 4D. Scale bar: 100  $\mu$ m.

### **Appendix Figure S2: Reduction in Mlh1 and Msh2 expression on loss of Gata6 in K14 $\Delta$ NLef1 tumors.**

(A) Digital tissue microarray of K14 $\Delta$ NLef1 and K14 $\Delta$ NLef1:cKO mice skin tumor sections labelled with Mlh1 antibody. Technical controls are displayed (without primary antibody incubation). A positive control (UVB-irradiated WT mice) and a negative control (WT mice) are also included. Some of these images are also depicted in Fig 5D.

(B) Digital tissue microarray of K14 $\Delta$ NLef1 and K14 $\Delta$ NLef1:cKO mice skin tumor sections labelled with Msh2 antibody with similar controls as in (A). Some of these images are also depicted in Fig 5E.

Data information: (A and B) Scale bar: 250  $\mu$ m.

### **Appendix Figure S3: Gata6 expression in a range of human skin tumors.**

Digital tissue microarray of human skin tumors sections labelled with Gata6 and PanKeratin antibodies. Some of these images are also depicted in Fig 6B. Scale bar: 100  $\mu$ m.

# Appendix Figure S1

Plet1 Atp6v1c2

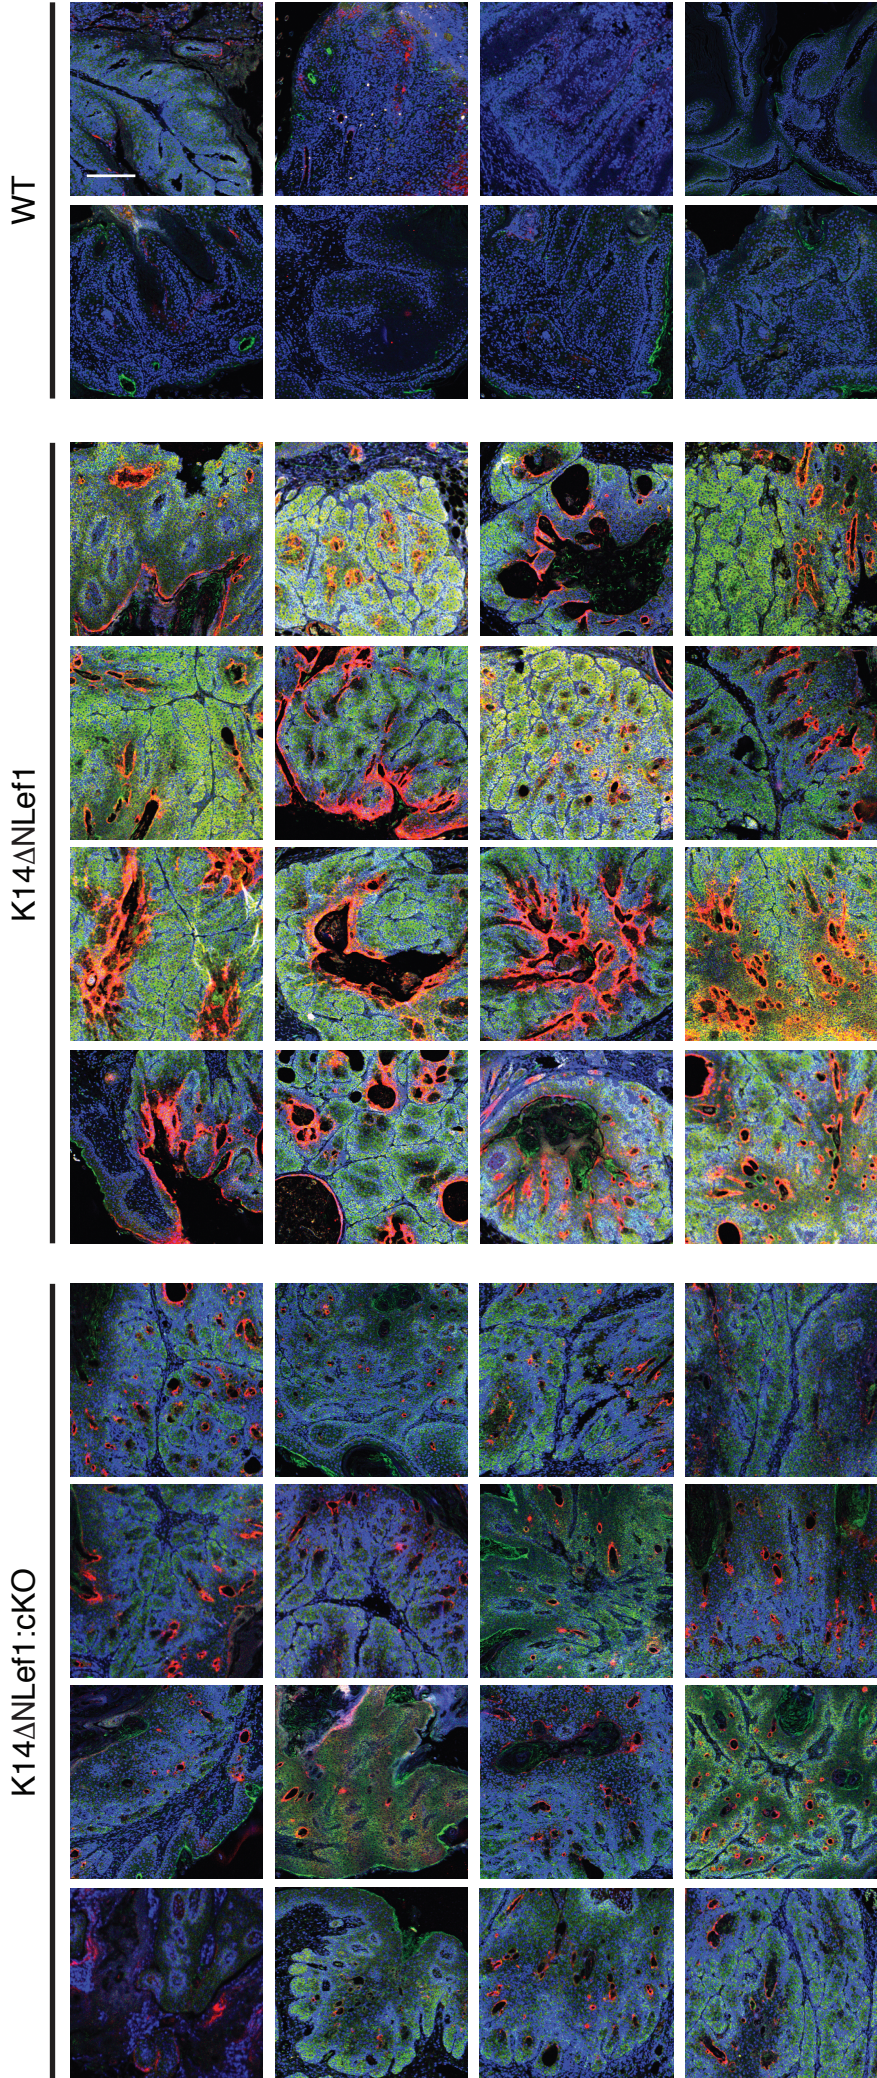

# Appendix Figure S2

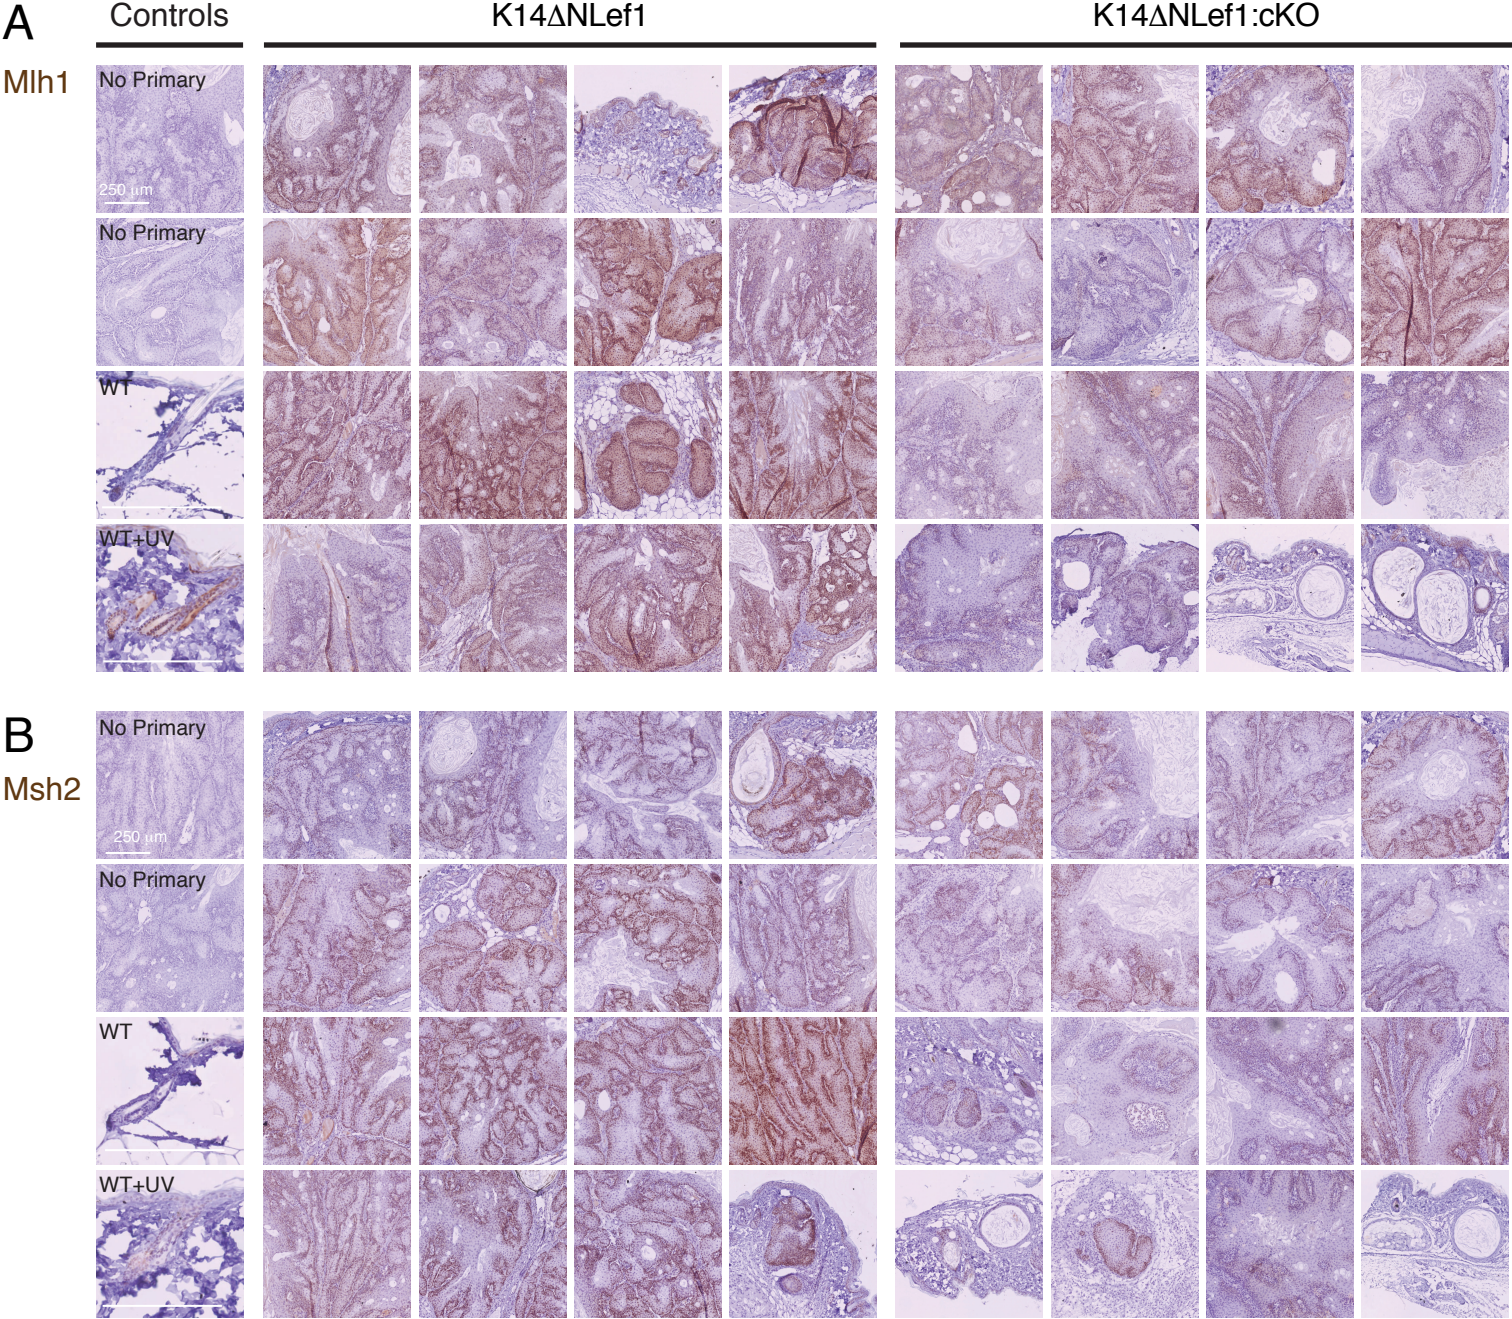

# Appendix Figure S3

## Human skin tumors

Gata6 PanKeratin

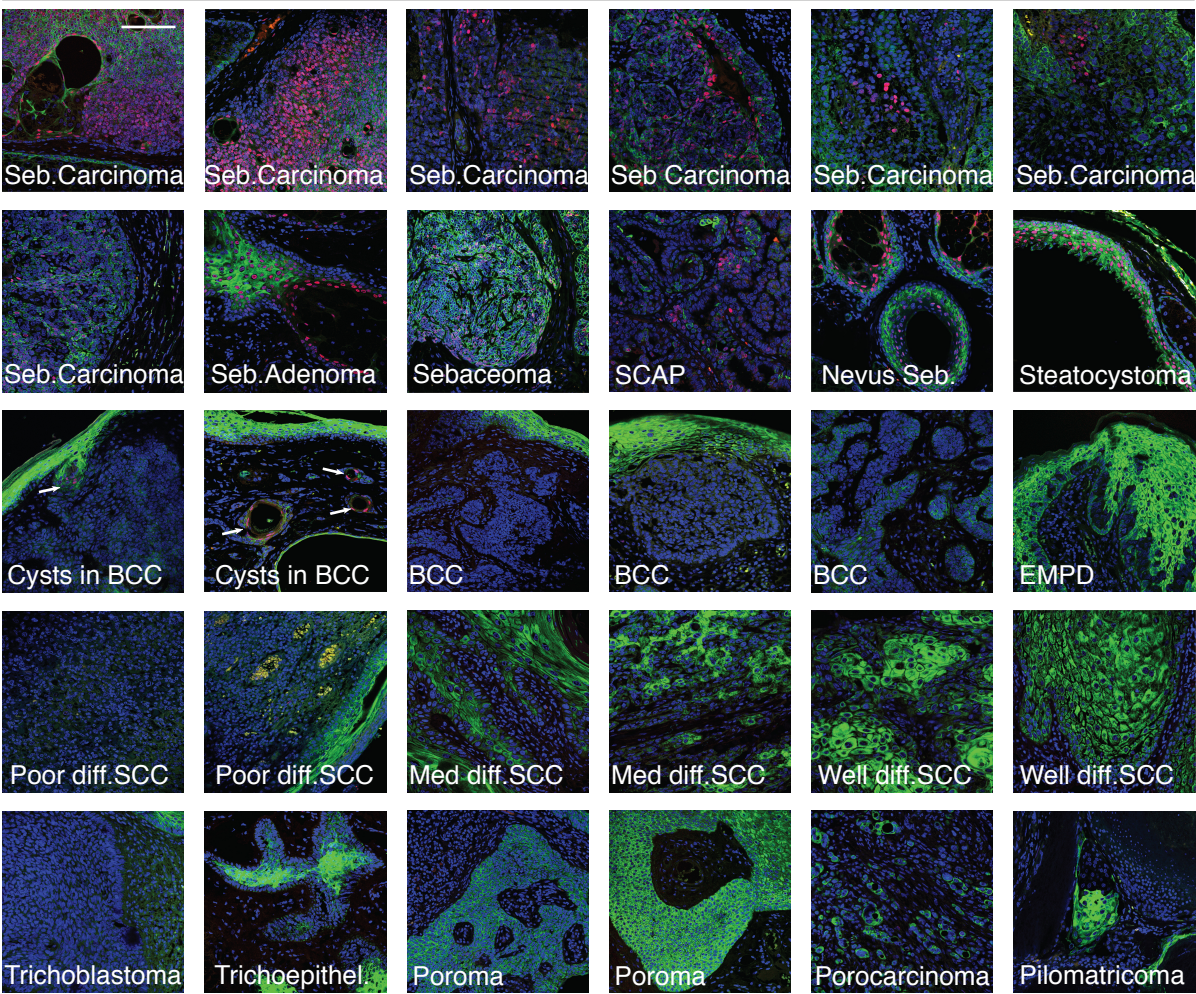

Supplement: EMBJ-38-e100526-s001.pdf [file EMBJ-38-e100526-s001.pdf]
